# Supplementary material for: Neuronal tuning and population representations of shape and category in human visual cortex.
Source: Research Square preprint supplement (doi:10.21203/rs.3.rs-3121050/v1), 2023-08-31
Supplement: Supplementary file 1 [file 99332699fcf37d72c92f2e9d.pdf]

## Reporting Summary

Nature Portfolio wishes to improve the reproducibility of the work that we publish. This form provides structure for consistency and transparency in reporting. For further information on Nature Portfolio policies, see our [Editorial Policies](#) and the [Editorial Policy Checklist](#).

### Statistics

For all statistical analyses, confirm that the following items are present in the figure legend, table legend, main text, or Methods section.

n/a Confirmed

- |                                     |                                     |                                                                                                                                                                                                                                                            |
|-------------------------------------|-------------------------------------|------------------------------------------------------------------------------------------------------------------------------------------------------------------------------------------------------------------------------------------------------------|
| <input type="checkbox"/>            | <input type="checkbox"/>            | The exact sample size ( $n$ ) for each experimental group/condition, given as a discrete number and unit of measurement                                                                                                                                    |
| <input type="checkbox"/>            | <input type="checkbox"/>            | A statement on whether measurements were taken from distinct samples or whether the same sample was measured repeatedly                                                                                                                                    |
| <input type="checkbox"/>            | <input checked="" type="checkbox"/> | The statistical test(s) used AND whether they are one- or two-sided<br><i>Only common tests should be described solely by name; describe more complex techniques in the Methods section.</i>                                                               |
| <input type="checkbox"/>            | <input checked="" type="checkbox"/> | A description of all covariates tested                                                                                                                                                                                                                     |
| <input type="checkbox"/>            | <input checked="" type="checkbox"/> | A description of any assumptions or corrections, such as tests of normality and adjustment for multiple comparisons                                                                                                                                        |
| <input type="checkbox"/>            | <input checked="" type="checkbox"/> | A full description of the statistical parameters including central tendency (e.g. means) or other basic estimates (e.g. regression coefficient) AND variation (e.g. standard deviation) or associated estimates of uncertainty (e.g. confidence intervals) |
| <input type="checkbox"/>            | <input checked="" type="checkbox"/> | For null hypothesis testing, the test statistic (e.g. $F$ , $t$ , $r$ ) with confidence intervals, effect sizes, degrees of freedom and $P$ value noted<br><i>Give <math>P</math> values as exact values whenever suitable.</i>                            |
| <input checked="" type="checkbox"/> | <input type="checkbox"/>            | For Bayesian analysis, information on the choice of priors and Markov chain Monte Carlo settings                                                                                                                                                           |
| <input type="checkbox"/>            | <input checked="" type="checkbox"/> | For hierarchical and complex designs, identification of the appropriate level for tests and full reporting of outcomes                                                                                                                                     |
| <input type="checkbox"/>            | <input checked="" type="checkbox"/> | Estimates of effect sizes (e.g. Cohen's $d$ , Pearson's $r$ ), indicating how they were calculated                                                                                                                                                         |

Our web collection on [statistics for biologists](#) contains articles on many of the points above.

### Software and code

Policy information about [availability of computer code](#)

Data collection

The experiment was controlled using Presentation software (Neurobehavioral Systems, Berkeley, CA, USA). We used Research Central Software Suite (Blackrock Neurotech) to configure hardware settings on the NeuroPort system, to visualize continuous signals and spikes in real time and to save experimental data.

Data analysis

We imported data to Matlab using the NPMK toolbox (Blackrock Neurotech, <https://github.com/BlackrockNeurotech/NPMK>). We analyzed all data using custom-written MATLAB R2020b (MathWorks, Natick, MA, USA) scripts and the EEGLAB toolbox (<https://scn.ucsd.edu/eeglab/index.php>).

For manuscripts utilizing custom algorithms or software that are central to the research but not yet described in published literature, software must be made available to editors and reviewers. We strongly encourage code deposition in a community repository (e.g. GitHub). See the Nature Portfolio [guidelines for submitting code & software](#) for further information.

## Data

Policy information about [availability of data](#)

All manuscripts must include a [data availability statement](#). This statement should provide the following information, where applicable:

- Accession codes, unique identifiers, or web links for publicly available datasets
- A description of any restrictions on data availability
- For clinical datasets or third party data, please ensure that the statement adheres to our [policy](#)

The datasets generated during and/or analysed during the current study are available from the corresponding author on reasonable request.

## Research involving human participants, their data, or biological material

Policy information about studies with [human participants or human data](#). See also policy information about [sex, gender \(identity/presentation\), and sexual orientation](#) and [race, ethnicity and racism](#).

### Reporting on sex and gender

Sex and gender were not considered in the design of this study. The research did not involve inquiries about participants' gender identities, with sex being determined solely on biological criteria. One male and two female patients were included, all of whom consented to share their individual-level data. Our decision not to conduct sex- and gender-based analysis was driven by the specific nature of our study, which neither hypothesized sex or gender effects nor possessed a sufficiently large sample size for such an analysis.

### Reporting on race, ethnicity, or other socially relevant groupings

There was not any socially relevant grouping of the patients and factors such as race, and ethnicity were not considered or asked.

### Population characteristics

The study cohort consisted of three patients: patient 1, a 24-year-old male; patient 2, a 54-year-old woman; and patient 3, a 58-year-old woman. Patients had undergone the placement of intracranial depth electrodes as part of their presurgical evaluation for drug-resistant focal epilepsy. Patient 2 was also diagnosed with Neurofibromatosis type 1, although she did not have any intracranial tumors related to this condition. At the age of 34, she experienced a left occipital intracranial hemorrhage, which was attributed to venous sinus thrombosis.

### Recruitment

We included patients with Utah arrays in adjacent areas, ensuring no bias that could affect the results. These arrays were placed in the occipital cortex, with no additional incisions made for the study's purposes.

### Ethics oversight

Ethics Committee Research UZ / KU Leuven (EC Research)

Note that full information on the approval of the study protocol must also be provided in the manuscript.

## Field-specific reporting

Please select the one below that is the best fit for your research. If you are not sure, read the appropriate sections before making your selection.

☒ Life sciences ☐ Behavioural & social sciences ☐ Ecological, evolutionary & environmental sciences

For a reference copy of the document with all sections, see [nature.com/documents/nr-reporting-summary-flat.pdf](https://www.nature.com/documents/nr-reporting-summary-flat.pdf)

## Life sciences study design

All studies must disclose on these points even when the disclosure is negative.

### Sample size

Statistics were conducted within subjects, not across subjects. The trial number was determined based on the performance of each individual patient.

### Data exclusions

No data exclusion

### Replication

For all patients, we have recordings from at least one session on a different day than the one reported in the manuscript, ensuring reproducibility. Furthermore, except for array 3, which is located in a different anatomical area compared to the other arrays, we also observe similar results across patients.

### Randomization

Randomization is not applicable to this study as it involves only three subjects, and our reporting focuses on each subject individually.

### Blinding

Blinding was not applicable to this study because both the recordings and the analysis necessitated the investigator's awareness of the conducted experiments and the presented stimuli.

# Reporting for specific materials, systems and methods

We require information from authors about some types of materials, experimental systems and methods used in many studies. Here, indicate whether each material, system or method listed is relevant to your study. If you are not sure if a list item applies to your research, read the appropriate section before selecting a response.

## Materials & experimental systems

| n/a                                 | Involved in the study                                  |
|-------------------------------------|--------------------------------------------------------|
| <input checked="" type="checkbox"/> | <input type="checkbox"/> Antibodies                    |
| <input checked="" type="checkbox"/> | <input type="checkbox"/> Eukaryotic cell lines         |
| <input checked="" type="checkbox"/> | <input type="checkbox"/> Palaeontology and archaeology |
| <input checked="" type="checkbox"/> | <input type="checkbox"/> Animals and other organisms   |
| <input type="checkbox"/>            | <input checked="" type="checkbox"/> Clinical data      |
| <input checked="" type="checkbox"/> | <input type="checkbox"/> Dual use research of concern  |
| <input checked="" type="checkbox"/> | <input type="checkbox"/> Plants                        |

## Methods

| n/a                                 | Involved in the study                           |
|-------------------------------------|-------------------------------------------------|
| <input checked="" type="checkbox"/> | <input type="checkbox"/> ChIP-seq               |
| <input checked="" type="checkbox"/> | <input type="checkbox"/> Flow cytometry         |
| <input checked="" type="checkbox"/> | <input type="checkbox"/> MRI-based neuroimaging |

## Clinical data

Policy information about [clinical studies](#)

All manuscripts should comply with the ICMJE [guidelines for publication of clinical research](#) and a completed [CONSORT checklist](#) must be included with all submissions.

|                             |                                                                                                                                                                                                                              |
|-----------------------------|------------------------------------------------------------------------------------------------------------------------------------------------------------------------------------------------------------------------------|
| Clinical trial registration | <i>Provide the trial registration number from ClinicalTrials.gov or an equivalent agency.</i>                                                                                                                                |
| Study protocol              | s53126                                                                                                                                                                                                                       |
| Data collection             | All data were collected and stored at the University Hospital UZ Leuven.                                                                                                                                                     |
| Outcomes                    | Not applicable, as our study's results represent an interim report of a translational research project associated with the protocol. Our findings do not pertain to the clinical trial on epilepsy within the same protocol. |
